# Supplementary material
Source: PubMed Central journal article supplement (PMC10529398)
Supplement: NIHMS1923146-supplement-Supinfo.pdf [file NIHMS1923146-supplement-Supinfo.pdf]

# The Promise of Cardiac Neuromodulation: Can Computational Modeling Bridge the Gap?

Olujimi A Ajijola and Michael B. Liu  
DOI: 10.1113/JP285309

*Corresponding author(s): Olujimi Ajijola (OAJijola@mednet.ucla.edu)*

*The referees have opted to remain anonymous.*

---

## Review Timeline:

Submission Date:

23-Jul-2023

Accepted:

25-Jul-2023

---

*Senior Editor: Natalia Trayanova*

*Reviewing Editor: Brian Delisle*

## Transaction Report:

(Note: With the exception of the correction of typographical or spelling errors that could be a source of ambiguity, letters and reports are not edited. Depending on transfer agreements, referee reports obtained elsewhere may or may not be included in this compilation. Referee reports are anonymous unless the Referee chooses to sign their reports.)

Dear Dr Ajjola,

Re: JP-P-2023-285309 "The Promise of Cardiac Neuromodulation: Can Computational Modeling Bridge the Gap?" by Olujimi A Ajjola and Michael B. Liu

We are pleased to tell you that your paper has been accepted for publication in The Journal of Physiology. Please see the complimentary comments of the reviewers below.

**TRANSPARENT PEER REVIEW POLICY:** To improve the transparency of its peer review process, The Journal of Physiology publishes online as supporting information the peer review history of all articles accepted for publication. Readers will have access to decision letters, including Editors' comments and referee reports, for each version of the manuscript, as well as any author responses to peer review comments. Referees can decide whether or not they wish to be named on the peer review history document.

The last Word (or similar) version of the manuscript provided will be used by the Production Editor to prepare your proof. When this is ready you will receive an email containing a link to Wiley's Online Proofing System. The proof should be thoroughly checked and corrected as promptly as possible.

Authors should note that it is too late at this point to offer corrections prior to proofing. The accepted version will be published online, ahead of the copy edited and typeset version being made available. Major corrections at proof stage, such as changes to figures, will be referred to the Editors for approval before they can be incorporated. Only minor changes, such as to style and consistency, should be made at proof stage. Changes that need to be made after proof stage will usually require a formal correction notice.

All queries at proof stage should be sent to: TJP@wiley.com.

Are you on Twitter? Once your paper is online, why not share your achievement with your followers? Please tag The Journal (@jphysiol) in any tweets and we will share your accepted paper with our 30,000 followers!

Yours sincerely,

Natalia Trayanova  
Senior Editor  
The Journal of Physiology

P.S. - You can help your research get the attention it deserves! Check out Wiley's free Promotion Guide for best-practice recommendations for promoting your work at [www.wileyauthors.com/eoo/guide](http://www.wileyauthors.com/eoo/guide). You can learn more about Wiley Editing Services which offers professional video, design, and writing services to create shareable video abstracts, infographics, conference posters, lay summaries, and research news stories for your research at [www.wileyauthors.com/eoo/promotion](http://www.wileyauthors.com/eoo/promotion).

**IMPORTANT NOTICE ABOUT OPEN ACCESS:** To assist authors whose funding agencies mandate public access to published research findings sooner than 12 months after publication, The Journal of Physiology allows authors to pay an Open Access (OA) fee to have their papers made freely available immediately on publication.

The Corresponding Author will receive an email from Wiley with details on how to register or log-in to Wiley Authors Services where you will be able to place an order.

You can check if your funder or institution has a Wiley Open Access Account here: <https://authorservices.wiley.com/author-resources/Journal-Authors/licensing-and-open-access/open-access/author-compliance-tool.html>.

-----

#### EDITOR COMMENTS

Reviewing Editor:

Drs. Ajjola and Liu have provided an excellent Perspective article.

-----

#### REFeree COMMENTS

Referee #1:

This is a superb and accessible overview of the Yang study, outlining both the advances and continuing areas for

development in future studies. I am truly honored for Drs. Ajjola and Liu having taking the time to write about our study.

**Confidential Review**

**23-Jul-2023**

---
